# Supplementary material for: Catalytic H2 evolution/oxidation in [FeFe]-hydrogenase biomimetics: account from DFT on the interplay of related issues and proposed solutions
Source: Royal Society of Chemistry journal article supplement (doi:10.1039/d0nj03393f), 2020-01-01
Supplement: d0nj03393f1.pdf [file d0nj03393f1.pdf]

# Catalytic H<sub>2</sub> Evolution/Oxidation in [FeFe]-hydrogenase biomimetics: account from DFT on the interplay of related issues and proposed solutions.

Federica Arrigoni,<sup>\*</sup> Luca Bertini, Raffaella Breglia,<sup>°</sup> Claudio Greco,<sup>°</sup> Luca De Gioia, Giuseppe Zampella<sup>\*</sup>

Department of Biotechnology and Biosciences, University of Milano - Bicocca,

Piazza della Scienza 2, 20126 Milan, Italy

<sup>°</sup> Department of Earth and Environmental Sciences, University of Milano - Bicocca,

Piazza della Scienza 1, 20126 Milan, Italy

## S1. Effect of the nature and number of P ligands installed on the Fe<sub>2</sub> core on $\Delta E^\circ$ gap.

Upon 1e reduction, repulsions originated by Et's groups are removed and strain is alleviated, but only in  $\mu$ -H isomers, in which the breaking of one Fe-H and Fe-Fe bonds occurs, allowing the Fe moieties to move apart. The bulky PEt<sub>3</sub>'s have thus more space to be accommodated, a situation described as "US" (shorthand form for "unstrained").

In contrast, the reduction of 4-PEt<sub>3</sub> t-H does not alleviate the steric strain, that still affects Fe<sup>II</sup>Fe<sup>I</sup> products: the origin of this difference resides in the  $\mu$ -CO that is present *exclusively* in t-H. Conceivably, four P ligands provide each Fe with large amount of electron density to back-donate to the strong  $\pi$ -acceptor CO. Moreover,  $\mu$ -CO in the 4-PEt<sub>3</sub> t-H is trans oriented to a strong  $\sigma$  donor per Fe, which better funnels electron density into Fe- $\mu$ C(O)-Fe bonds. These strong interactions hold together the two Fe subunits, impeding to release repulsions, in sharp contrast to what occurring in  $\mu$ -H isomers.

The non-obvious opposite reductive behavior ( $\Delta E^\circ_{\text{gap}} > 0$ ) in similar 4-PMe<sub>3</sub> has been justified by a lower crowding experienced by PMe<sub>3</sub> vs PEt<sub>3</sub>, once the two ligands have been installed in metal coordination.

## S2. Effect of a strong $\sigma$ -donor apically bound at Fe on $\Delta E^\circ$ gap.

As an example, replacing CH<sub>3</sub>S<sup>-</sup> at Fe<sub>p</sub> by a CO leads to  $\Delta E^\circ_{\text{gap}} > 0$ , regardless of the presence of four PEt<sub>3</sub> in the other coordination positions. It can be noted that the most stable isomer in such case features the CO in Fe basal position. As mentioned before, L<sub>ap</sub> is crucial to convey further electron density into Fe orbitals, that in turn  $\pi$ -back donate it to the bridging CO. This makes one Fe-CO bond stronger in t-H.

Notably, models with a neutrally charged  $\sigma$ -donor (e.g., NHC) replacing  $\text{CH}_3\text{S}^-$  still feature  $\Delta E^\circ_{\text{gap}} < 0$ , despite being starting t-H not subject to steric destabilization (US). Structural parameters (Fe-H, Fe-Fe and Fe-P distances) clearly show that t-H's with neutral  $L_{\text{ap}}$  have the two Fe subunits quite separated already at the  $\text{Fe}^{\text{II}}\text{Fe}^{\text{II}}$  state, thus resulting *stable before and after reduction*. This is compatible with the less electron density pushed by neutral ligands into the Fe- $\mu\text{CO}$  bond in trans to bis-carbene ( $L_{\text{ap}}$ ).

The  $\sigma$ -donating power of  $L_{\text{ap}}$  and the Fe- $\mu\text{CO}$ -Fe bond strength are directly related and this explains why diferrous  $L_{\text{ap}} = \text{CH}_3\text{S}^-$  instance features compact and strained structure, whereas  $L_{\text{ap}} =$  (neutral donors) do not. Unexpectedly, species with  $L_{\text{ap}} = \text{CO}$  (weak  $\sigma$ -donor; strong  $\pi$ -acceptor) feature the same US t-H structure as  $L_{\text{ap}} = \text{NHC}$ , but opposite reductive behavior.

Unexpectedly (see the body text of the main discussion), species with  $L_{\text{ap}} = \text{CO}$  (weak  $\sigma$ -donor; strong  $\pi$ -acceptor) feature the same US t-H structure as  $L_{\text{ap}} = \text{NHC}$ , but opposite reductive behavior, i.e.,  $\Delta E^\circ_{\text{gap}} > 0$ . The apparent contradiction requires considering the electronic properties that coordinated L's have on the Fe-Fe, rather than the Fe- $\mu\text{CO}$ -Fe bond strength (see Scheme S1). Although in ferrous species the 18-electron rule would formally require a genuine Fe-Fe bond formation, one may argue that in very electron rich metal cores (as in the case of  $L_{\text{ap}} =$  donors) such requisite is less strictly necessary, due to some compensation brought by strong donors. In contrast, with CO, Fe is clearly electron poorer, so that the electron counting entails Fe-Fe bond formation. In such case, therefore, the steric strain in t-H is essentially due to a relatively strong Fe-Fe bond. The subsequent reduction alleviates the strain, because the Fe-Fe bond is relatively weaker than the Fe-CO bond of the more electron rich derivatives.

#### Electronic effects of apical Fe ligands on the strain of $2\text{Fe}^{\text{II}}$ structures

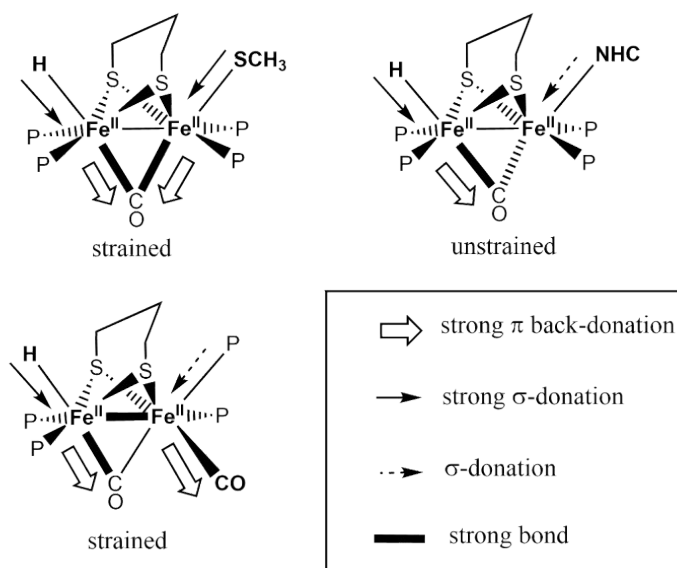

**Scheme S1.** Electron donating/accepting influence on key bonds that govern the repulsive strain presence (absence) in oxidized diiron structures.

A generalized picture of the “strain release/retention” model is:  $\Delta E^\circ \text{ gap} \neq 0$  ultimately depends on change/retention that the initial strain state (S/US) of t-H and  $\mu$ -H of a given species manifests upon reduction. As an example,  $\Delta E^\circ \text{ gap} < 0$  can be obtained both by  $[(S \rightarrow US)_{\mu H} / (S \rightarrow S)_{tH}]$  and “ $[(S \rightarrow US)_{\mu H} / (US \rightarrow US)_{tH}]$ ”.
